# Supplementary material
Source: publisher figshare collection journal article supplement (https://frontiersin.figshare.com/ndownloader/files/22723892)

## Supplementary Material

Environmental factors override dispersal-related factors in shaping diatom and macroinvertebrate communities within stream networks in China

Siwen He, Janne Soininen, Kai Chen, Beixin Wang\*

\*Correspondence: [wangbeixin@njau.edu.cn](mailto:wangbeixin@njau.edu.cn)

### Text S1. Supplementary information on the linear mixed effect model (LME)

We used the linear mixed effect model (LME) to assess the effect of the environmental and geographical distances on community similarity (Sarremejane et al., 2017; He et al., 2020). We used minimum likelihood population effects (MLPE, Clarke et al., 2002) method to account for the non-independence of the distance matrices. In this method, a linear mixed effect model is used as an alternative to traditional linear regression. The random effect (i.e. covariate structure) of the model incorporates a parameter ( $\rho$ ) that accounts for the proportion of the total variance ( $\sigma^2$ ) due to the correlation between distances that originates from the same sampling sites. The covariance between two pairwise distances without a common site is 0. For example, if  $d_{ij}$  is the geographical distance between site  $i$  and  $j$ , then  $d_{12}$  and  $d_{13}$  have a covariance of  $\rho\sigma^2$ , whereas  $d_{12}$  and  $d_{34}$  have a covariance of 0. Residual maximum likelihood (Clarke et al., 2002) is used to obtain unbiased estimates of MLPE model parameters. We assess the amount of variation explained by fixed effect (i.e. environmental and geographical distances) using a marginal  $R^2$  statistic for each model. Here,  $R^2_\beta$  is calculated from the  $F$ -statistic and the degrees of the freedom derived from Kenward-Roger's estimates (Edwards et al., 2008) using the difference in explained variation between the model that only includes the fixed and random effects and a null model that only includes random effects. Collinearity between explanatory variables (i.e. environmental and geographical distances) can be a serious problem when one wants to assess the "true" effect of a variable. We tested for the collinearity between explanatory variables prior to LME analysis. In the case of correlations between explanatory variables, we calculated the  $R^2_\beta$  by comparing a model combining the explanatory variable of interest, its significant ( $P < 0.05$ ) collinear variables and the random effects to a null model combining only the collinear variables and the random effects (Sarremejane et al. 2017). We used the R packages "lme4" (Bates et al., 2015) for MLPE, and "pbkrtest" (Halekoh and Højsgaard, 2014) for the Kenward-Roger's estimates.

### References not in the main text

- Bates, D., Mächler, M., Bolker, B., and Walker, S. (2015). Fitting Linear Mixed-Effects Models Using lme4. *J. Stat. Softw.* 67, 1-48. doi:10.18637/jss.v067.i01.
- Clarke, R. T., Rothery, P., and Raybould, A. F. (2002). Confidence Limits for Regression Relationships between Distance Matrices: Estimating Gene Flow with Distance. *J. Agric. Biol. Environ. Stat.* 7, 361-372. doi:10.1198/108571102320.
- Edwards, L. J., Muller, K. E., Wolfinger, R. D., Qaqish, B. F., and Schabenberger, O. (2008). An  $R^2$  statistic for fixed effects in the linear mixed model. *Stat. Med.* 27, 6137-6157. doi:10.1002/sim.3429

Halekoh, U., and Højsgaard, S. (2014). A Kenward-Roger Approximation and Parametric Bootstrap Methods for Tests in Linear Mixed Models - The R Package pbkrtest. *J. Stat. Softw.* 59, 32. doi:10.18637/jss.v059.i09.

**Text S2.** Supplementary information on connectivity measures.

We followed Kindlmann and Burel (2008) to define metacommunity connectivity as “the ease with which these individual macroinvertebrates and diatoms can move about within the region”. As 1) most of macroinvertebrates can actively dispersal to select suitable habitats, while small diatoms are passively randomly dispersed by wind, stream flow and animals (Farjalla et al., 2012); 2) the connectivity for active dispersers relies on migration, but the connectivity for passive dispersers is driven by physical dispersal (Yeh et al., 2015). We thus estimated the metacommunity connectivity for macroinvertebrates and diatoms differently. Metacommunity connectivity for macroinvertebrates was measured as:

$$\text{Avg. Con.} = \frac{1}{n} \sum_{i=1}^n \text{Con.}_i$$
$$\text{Con.}_i = \frac{1}{m} \frac{1}{n-1} \sum_{j=1, j \neq i}^n \sum_{k=1}^m p_{jk} \exp(-d_{ij})$$

*Avg. Con.* is the average of site connectivities,  $d_{ij}$  is the distance between site  $i$  (focal site) and  $j$  (surrounding site),  $p$  indicates the presence or absence of  $k$ th taxa in the  $j$ th site,  $n$  is the total number of sites, and  $m$  is the total number of taxa in the site pair (i.e. site  $i$  and  $j$ ). This equation quantifies how easy the  $n-1$  sites can contribute the same  $k$ th species to the focal site  $i$ , with a weighting function depends on the distance between sites, since the distance reflects the resistance of colonization. The contribution of each surrounding site  $j$  is computed by the geographic distance with the negative exponential kernel, meaning that active dispersers which are separated far away should have a larger resistance to colonization, and thus have smaller contribution to the connectivity.

However, diatoms belong to passive dispersers; their dispersal relies on physical mechanisms (i.e. dispersed by wind, stream flow and animals). Therefore, the connectivity (contribution of each surrounding site  $j$ ) depends on the physical dispersal strength; this is fundamentally different from the assumption for active dispersers. For passive dispersers, the sites that are far apart should result in larger resistance of colonization. Therefore, for that sites located far away to have the same species, it requires stronger physical dispersal strength to overcome the resistance, and thus have large contribution to the connectivity. As such, metacommunity connectivity for diatoms was measured as:

$$\text{Avg. Con.} = \frac{1}{n} \sum_{i=1}^n \text{Con.}_i$$
$$\text{Con.}_i = \frac{1}{m} \frac{1}{n-1} \sum_{j=1, j \neq i}^n \sum_{k=1}^m p_{jk} 1/\exp(-d_{ij})$$

Analyses of metacommunity connectivity were conducted in R software (R Core Team 2018).

References not in the main text

- Kindlmann, P., and Burel, F. (2008). Connectivity measures: a review. *Landscape Ecol.* 23, 879-890. doi: 10.1007/s10980-008-9245-4.
- Yeh, Y. C., Peres-Neto, P. R., Huang, S. W., Lai, Y. C., Tu, C. Y., Shiah, F. K., et al. (2015). Determinism of bacterial metacommunity dynamics in the southern East China Sea varies depending on hydrography. *Ecography* 38, 198-212. doi:10.1111/ecog.00986.

**Table S1.** Final model results of multiple regression of distance matrices (MRM) analyses between community dissimilarity and explanatory distance matrices (environmental and geographical distance) for stream macroinvertebrates and diatoms in ITR, QTR and MKR, based on 10,000 permutations. Analyses were conducted for whole network and separately for headwaters and mainstems based on abundance data. - represents matrix was not included in the final model. Four explanatory matrices are local environmental, climatic, land use and geographical distance matrix. \*\*\* P < 0.001; \*\* P < 0.01; \* P < 0.05.

| Taxon              | Basin | Stream type   | Standardized Coefficients |                   |         |          |              | Full model |            |
|--------------------|-------|---------------|---------------------------|-------------------|---------|----------|--------------|------------|------------|
|                    |       |               | Intercept                 | Local environment | Climate | Land use | Geographical | R2         | F          |
| Macroinvertebrates | ITR   | Whole network | 0.62                      | -                 | 0.31*** | -        | -            | 0.09       | 44.70***   |
|                    |       | Headwaters    | 0.59                      | -                 | 0.25*   | -        | -            | 0.06       | 6.61*      |
|                    |       | Mainstems     | 0.50                      | 0.28**            | 0.31**  | -        | -            | 0.21       | 13.91***   |
|                    | QTR   | Whole network | 0.60                      | -                 | 0.22**  | 0.45***  | -            | 0.36       | 118.92/*** |
|                    |       | Headwaters    | 0.42                      | 0.48***           | 0.34**  | -        | -            | 0.53       | 56.62***   |
|                    |       | Mainstems     | -                         | -                 | -       | -        | -            | -          | -          |
|                    | MKR   | Whole network | 0.48                      | 0.33**            | -       | 0.38**   | -            | 0.39       | 136.96***  |
|                    |       | Headwaters    | 0.65                      | -                 | -       | 0.71***  | -            | 0.50       | 104.71***  |
|                    |       | Mainstems     | 0.46                      | 0.53***           | -       | 0.39***  | -            | 0.40       | 34.96***   |
| Diatoms            | ITR   | Whole network | 0.65                      | -                 | 0.32*** | -        | -            | 0.10       | 48.78***   |
|                    |       | Headwaters    | 0.45                      | 0.43***           | 0.30**  | -        | -            | 0.32       | 23.76***   |
|                    |       | Mainstems     | 0.52                      | 0.46**            | 0.36**  | -        | -            | 0.42       | 36.50***   |
|                    | QTR   | Whole network | 0.75                      | 0.26*             | -       | 0.29**   | -            | 0.26       | 77.19***   |
|                    |       | Headwaters    | 0.71                      | -                 | 0.34*   | -        | -            | 0.11       | 13.53*     |
|                    |       | Mainstems     | 0.59                      | 0.54***           | 0.20*   | -        | -            | 0.37       | 31.13***   |
|                    | MKR   | Whole network | 0.77                      | 0.22**            | -       | -        | 0.16**       | 0.08       | 19.06***   |
|                    |       | Headwaters    | 0.80                      | -                 | 0.28*   | -        | -            | 0.07       | 8.76*      |
|                    |       | Mainstems     | 0.79                      | 0.38**            | -       | -        | -            | 0.15       | 17.55***   |

**Table S2.** Summary of determination coefficients ( $R^2_\beta$ ) for the relationships between community dissimilarity and explanatory distance matrices (environmental and geographical distance) for stream macroinvertebrates and diatoms in the ITR, QTR and MKR regions based on the linear mixed effect model (LME). Four explanatory matrices are local environmental, climatic, land use and geographical distance matrices. Analyses were conducted only at the whole network level.

| Taxon              | Region | $R^2_\beta$       |         |          |              |
|--------------------|--------|-------------------|---------|----------|--------------|
|                    |        | Local environment | Climate | Land use | Geographical |
| Macroinvertebrates | ITR    | 0.2798            | 0.2368  | 0.0003   | 0.0004       |
|                    | QTR    | 0.1434            | 0.4316  | 0.6224   | 0.0002       |
|                    | MKR    | 0.4109            | 0.0834  | 0.2568   | 0.0101       |
| Diatoms            | ITR    | 0.2875            | 0.0206  | 0.0090   | 0.0036       |
|                    | QTR    | 0.3200            | 0.0799  | 0.1117   | 0.0614       |
|                    | MKR    | 0.2221            | 0.0024  | 0.0567   | 0.1322       |

**Table S3** Results of two-way ANOVA testing for the effects of organism group (i.e., between macroinvertebrates and diatoms) and region on the strength of relationship between community dissimilarities and environmental distance calculated using the coefficient of determination ( $R^2_\beta$ ). At Local-scale + Basin-scale, we treated all the obtained determination coefficients ( $n = 18$ ) as independent estimates in the tests. At Basin-scale, we treated all the obtained land use  $R^2_\beta$  and climate  $R^2_\beta$  ( $n = 12$ ) as independent estimates in the tests. Df, degrees of freedom; MS, mean squares; P, significance level; SS, sum of squares. Significant P-values are in bold.

| Factor                         | Local-scale + Basin-scale |       |       |       |       | Basin-scale |       |       |        |              |
|--------------------------------|---------------------------|-------|-------|-------|-------|-------------|-------|-------|--------|--------------|
|                                | Df                        | SS    | MS    | F     | P     | Df          | SS    | MS    | F      | P            |
| Organism group                 | 1                         | 0.103 | 0.102 | 3.786 | 0.076 | 1           | 0.153 | 0.153 | 14.636 | <b>0.009</b> |
| Region                         | 2                         | 0.070 | 0.035 | 1.285 | 0.312 | 2           | 0.140 | 0.070 | 6.718  | <b>0.029</b> |
| Organism group $\times$ Region | 2                         | 0.020 | 0.010 | 0.362 | 0.704 | 2           | 0.064 | 0.032 | 3.074  | 0.121        |
| Residuals                      | 12                        | 0.325 | 0.027 |       |       | 6           | 0.063 | 0.010 |        |              |

**Table S4.** Set of environmental variables identified for stream macroinvertebrates in the ITR, QTR and MKR regions by BIO-ENV analysis. BIO-ENV analyses were conducted for the whole network and separately for headwater and downstream sites based on presence-absence data (N = number of variables identified by BIO-ENV analysis). Abbreviations below axis are as follows. Water temperature, WT; total dissolved solids, TDS; conductivity, Cond; calcium, Ca<sup>2+</sup>; magnesium, Mg<sup>2+</sup>; total nitrogen, TN; total phosphorus, TP; ammonia nitrogen, NH<sub>4</sub>-N; phosphate, PO<sub>4</sub>-P; Mean Diurnal Range (Mean of monthly (max temp - min temp)), BIO2; Isothermality, BIO3; Mean Temperature of Wettest Quarter, BIO8; Mean Temperature of Driest Quarter, BIO9; Mean Temperature of Warmest Quarter, BIO10; Annual Precipitation, BIO12; Precipitation Seasonality (Coefficient of Variation), BIO15; Precipitation of Wettest Quarter, BIO16; Precipitation of Driest Quarter, BIO17; Precipitation of Warmest Quarter, BIO18.

| Region | Stream type   | Local environment                                                        | N | Climate                | N | Land use            | N |
|--------|---------------|--------------------------------------------------------------------------|---|------------------------|---|---------------------|---|
| ITR    | Whole network | TDS, TP, % sands, % gravels                                              | 4 | Elevation, BIO15, BIO9 | 3 |                     | 0 |
|        | Headwater     | TDS, PO <sub>4</sub> -P, TP, % gravels                                   | 4 | BIO2, BIO10, BIO17     | 3 |                     | 0 |
|        | Downstream    | WT, TP, % gravels, % cobbles                                             | 4 |                        | 0 |                     | 0 |
| QTR    | Whole network | Wetted width, WT, Cond, Ca <sup>2+</sup> , PO <sub>4</sub> -P, % cobbles | 6 | Elevation              | 1 | % forest            | 1 |
|        | Headwater     | WT, pH                                                                   | 2 | Elevation              | 1 |                     | 0 |
|        | Downstream    | Cond, NH <sub>4</sub> -N, % cobbles, pH                                  | 4 |                        | 0 |                     | 0 |
| MKR    | Whole network | WT, TN, TP, % sands, % cobbles                                           | 5 |                        | 0 | % urban, % farmland | 2 |
|        | Headwater     | WT, Water depth, TN, TP, % sands, % cobbles                              | 6 |                        | 0 | % urban, % farmland | 2 |
|        | Downstream    |                                                                          | 0 |                        | 0 |                     | 0 |

**Table S5.** Set of environmental variables identified for stream diatoms in the ITR, QTR and MKR regions by BIO-ENV analysis. BIO-ENV analyses were conducted for the whole network and separately for headwater and downstream sites based on presence-absence data (N = number of variables identified by BIO-ENV analysis).

| Region | Stream type   | Local environment                                                                                              | N | Climate                             | N | Land use | N |
|--------|---------------|----------------------------------------------------------------------------------------------------------------|---|-------------------------------------|---|----------|---|
| ITR    | Whole network | TDS, Ca <sup>2+</sup> , Mg <sup>2+</sup> , NH <sub>4</sub> -N, % gravels, pH                                   | 6 | Elevation, BIO2, BIO3, BIO12, BIO18 | 5 |          | 0 |
|        | Headwater     | TDS, Ca <sup>2+</sup> , NH <sub>4</sub> -N, % sands, pH                                                        | 5 | Elevation, BIO18                    | 2 |          | 0 |
|        | Downstream    | Mg <sup>2+</sup> , % gravels, pH                                                                               | 3 |                                     | 0 |          | 0 |
| QTR    | Whole network | Water depth, Cond, Mg <sup>2+</sup> , Ca <sup>2+</sup> , PO <sub>4</sub> -P                                    | 5 |                                     | 0 | % forest | 1 |
|        | Headwater     | WT, Cond, TP, Mg <sup>2+</sup> , % gravels, % sands                                                            | 6 |                                     | 0 |          | 0 |
|        | Downstream    | Water depth, Cond, NH <sub>4</sub> -N, Mg <sup>2+</sup> , Ca <sup>2+</sup> , PO <sub>4</sub> -P, % cobbles, pH | 8 |                                     | 0 |          | 0 |
| MKR    | Whole network | WT, Wetted width, Water depth, TN, TP, % cobbles, % boulders                                                   | 7 |                                     | 0 |          | 0 |
|        | Headwater     |                                                                                                                | 0 | BIO8, BIO9, BIO16                   | 3 |          | 0 |
|        | Downstream    | WT, Wetted width, Water depth, Cond, TN, PO <sub>4</sub> -P                                                    | 6 |                                     | 0 |          | 0 |



**Table S6.** Results of metacommunity connectivity estimations and mean pairwise beta-diversity (Sørensen dissimilarity) measures for macroinvertebrates and diatoms at different stream locations (i.e., headwater and downstream) in three regions.

| Region | Stream location | Macroinvertebrates    |                | Diatoms                |                |
|--------|-----------------|-----------------------|----------------|------------------------|----------------|
|        |                 | Connectivity          | Beta-diversity | Connectivity           | Beta-diversity |
| ITR    | Headwater       | $9.90 \times 10^{-3}$ | 0.46           | $6.10 \times 10^{121}$ | 0.57           |
|        | Downstream      | $3.55 \times 10^{-3}$ | 0.52           | $2.37 \times 10^{131}$ | 0.61           |
| QTR    | Headwater       | $2.02 \times 10^{-3}$ | 0.45           | $1.27 \times 10^{84}$  | 0.48           |
|        | Downstream      | $7.68 \times 10^{-3}$ | 0.56           | $1.16 \times 10^{70}$  | 0.56           |
| MKR    | Headwater       | $6.66 \times 10^{-7}$ | 0.56           | $1.12 \times 10^{68}$  | 0.68           |
|        | Downstream      | $1.10 \times 10^{-3}$ | 0.46           | $6.45 \times 10^{62}$  | 0.71           |

**Figure S1.** The correlations between diatom community composition and macroinvertebrate community composition controlling for environmental distance (white bar) and geographical distance (gray bar) in three basins. \*  $P < 0.05$ .

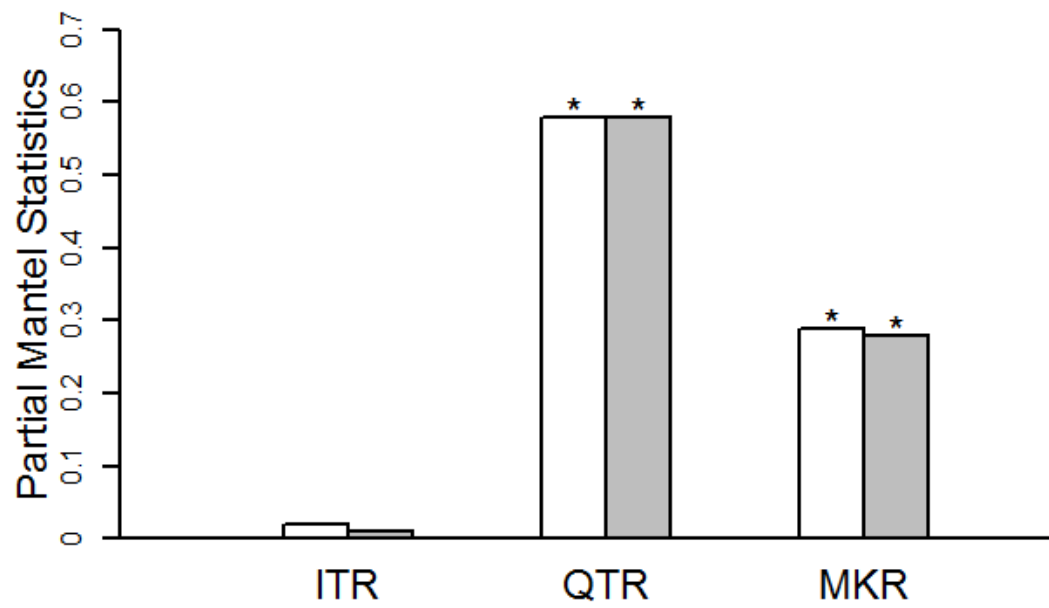

Supplement: Supplementary file 1 [file 22723892]
